# Supplementary material for: Notoginsenoside R1 Improves Cerebral Ischemia/Reperfusion Injury by Promoting Neurogenesis via the BDNF/Akt/CREB Pathway
Source: PubMed Central journal article supplement (PMC8138209; doi:10.3389/fphar.2021.615998), 2021-05-07
Supplement: DataSheet2.pdf [file DataSheet2.pdf]

In statistics, degrees of freedom refer to the number of variables whose values are not restricted when calculating a certain statistic. Degrees of freedom are usually used in sampling distributions. F value is the statistic of F test, which is used to test the variance of two samples. The larger the F value is, the more significant the equation is and the better the fitting degree is. P value is a decreasing indicator of the credibility of the results. The larger the P value is, the more unreliable the result is, and the smaller the P value is, the more reliable the result is. A P value of less than 0.05 was considered statistically significant. In addition, in the statistical interpretation, we generally do not pay attention to the F value, we only need to pay attention to the P value.

| Figure                            | Index     | Group                                | df        | F value | P value |       |
|-----------------------------------|-----------|--------------------------------------|-----------|---------|---------|-------|
| Figure 2                          | B         | Infarct volume                       | Sham vs 0 | 5       | 36.571  | <0.01 |
|                                   |           |                                      | 0 vs 10   |         |         | >0.05 |
|                                   |           |                                      | 0 vs 20   |         |         | <0.01 |
|                                   |           |                                      | 0 vs 40   |         |         | <0.01 |
|                                   |           |                                      | 0 vs Eda  |         |         | <0.01 |
|                                   | D         | Neuronal density level in cortex     | Sham vs 0 | 5       | 6.985   | <0.01 |
|                                   |           |                                      | 0 vs 10   |         |         | >0.05 |
|                                   |           |                                      | 0 vs 20   |         |         | <0.01 |
|                                   |           |                                      | 0 vs 40   |         |         | <0.01 |
|                                   |           |                                      | 0 vs Eda  |         |         | <0.01 |
|                                   |           | Neuronal density level in CA1        | Sham vs 0 | 5       | 2.856   | <0.01 |
|                                   |           |                                      | 0 vs 10   |         |         | >0.05 |
|                                   |           |                                      | 0 vs 20   |         |         | <0.05 |
|                                   |           |                                      | 0 vs 40   |         |         | <0.05 |
|                                   |           |                                      | 0 vs Eda  |         |         | <0.05 |
|                                   |           | Nissl bodies density level in cortex | Sham vs 0 | 5       | 4.999   | <0.01 |
|                                   |           |                                      | 0 vs 10   |         |         | >0.05 |
|                                   |           |                                      | 0 vs 20   |         |         | <0.05 |
|                                   |           |                                      | 0 vs 40   |         |         | <0.05 |
|                                   |           |                                      | 0 vs Eda  |         |         | <0.05 |
| Nissl bodies density level in CA1 | Sham vs 0 | 5                                    | 5.195     | <0.01   |         |       |
|                                   | 0 vs 10   |                                      |           | >0.05   |         |       |
|                                   | 0 vs 20   |                                      |           | <0.01   |         |       |

|                            |                                         |                            |                            |        |        |       |
|----------------------------|-----------------------------------------|----------------------------|----------------------------|--------|--------|-------|
|                            |                                         |                            | 0 vs 40                    |        |        | <0.05 |
|                            |                                         |                            | 0 vs Eda                   |        |        | <0.05 |
| Figure 4                   | A                                       | Neurological deficit score | 1d                         | 9      | 29.677 | >0.05 |
|                            |                                         |                            | 7d                         |        |        | >0.05 |
|                            |                                         |                            | 14d                        |        |        | <0.05 |
|                            |                                         |                            | 21d                        |        |        | <0.05 |
|                            |                                         |                            | 28d                        |        |        | <0.05 |
|                            |                                         |                            |                            |        |        |       |
|                            | B                                       | Use of impaired forelimb   | MCAO/R vs MCAO/R+R1 (1 d)  | 8      | 13.88  | >0.05 |
|                            |                                         |                            | MCAO/R vs MCAO/R+R1 (7 d)  |        |        | >0.05 |
|                            |                                         |                            | MCAO/R vs MCAO/R+R1 (14 d) |        |        | <0.01 |
|                            |                                         |                            | MCAO/R vs MCAO/R+R1 (21 d) |        |        | <0.01 |
|                            |                                         |                            | MCAO/R vs MCAO/R+R1 (28 d) |        |        | <0.01 |
|                            | C                                       | Discrimination index       | Sham vs MCAO/R             | 2      | 4.152  | <0.05 |
|                            |                                         |                            | MCAO/R vs MCAO/R+R1        |        |        | <0.05 |
|                            | D                                       | Body weight                | Sham vs MCAO/R (0d)        | 8      | 5.498  | >0.05 |
|                            |                                         |                            | MCAO/R vs MCAO/R+R1 (0 d)  |        |        | >0.05 |
|                            |                                         |                            | Sham vs MCAO/R (7 d)       |        |        | <0.01 |
|                            |                                         |                            | MCAO/R vs MCAO/R+R1 (7 d)  |        |        | >0.05 |
|                            |                                         |                            | Sham vs MCAO/R (14 d)      |        |        | <0.01 |
|                            |                                         |                            | MCAO/R vs MCAO/R+R1 (14 d) |        |        | <0.01 |
| Sham vs MCAO/R (21 d)      |                                         |                            | <0.01                      |        |        |       |
| MCAO/R vs MCAO/R+R1 (21 d) |                                         |                            | <0.05                      |        |        |       |
| Sham vs MCAO/R (28 d)      |                                         |                            | <0.01                      |        |        |       |
| MCAO/R vs MCAO/R+R1 (28 d) |                                         |                            | <0.05                      |        |        |       |
| D                          | DCX <sup>+</sup> /EdU <sup>+</sup> cell | Sham vs MCAO/R             | 3                          | 32.956 | <0.05  |       |
|                            |                                         | MCAO/R vs MCAO/R+R1        |                            |        | <0.01  |       |

|                  |                          |                                            |                         |         |        |       |
|------------------|--------------------------|--------------------------------------------|-------------------------|---------|--------|-------|
|                  |                          |                                            | MCAO/R vs<br>MCAO/R+NBP |         |        | <0.01 |
|                  | E                        | Nestin <sup>+</sup> /EdU <sup>+</sup> cell | Sham vs MCAO/R          | 3       | 36.333 | >0.05 |
|                  |                          |                                            | MCAO/R vs<br>MCAO/R+R1  |         |        | <0.01 |
|                  |                          |                                            | MCAO/R vs<br>MCAO/R+NBP |         |        | <0.01 |
|                  | F                        | NeuN <sup>+</sup> /EdU <sup>+</sup> cell   | Sham vs MCAO/R          | 3       | 55.732 | <0.05 |
|                  |                          |                                            | MCAO/R vs<br>MCAO/R+R1  |         |        | <0.01 |
|                  |                          |                                            | MCAO/R vs<br>MCAO/R+NBP |         |        | <0.01 |
| Figure 5         | B                        | APC <sup>+</sup> /EdU <sup>+</sup> cell    | Sham vs MCAO/R          | 3       | 56.515 | >0.05 |
|                  |                          |                                            | MCAO/R vs<br>MCAO/R+R1  |         |        | <0.01 |
|                  |                          |                                            | MCAO/R vs<br>MCAO/R+NBP |         |        | <0.01 |
|                  | D                        | CNPase/ $\beta$ -actin                     | Sham vs MCAO/R          | 3       | 10.998 | <0.01 |
|                  |                          |                                            | MCAO/R vs<br>MCAO/R+R1  |         |        | <0.05 |
|                  | E                        | MBP/ $\beta$ -actin                        | Sham vs MCAO/R          | 3       | 2.117  | >0.05 |
|                  | MCAO/R vs<br>MCAO/R+R1   |                                            | <0.05                   |         |        |       |
| F                | Vimentin/ $\beta$ -actin | Sham vs MCAO/R                             | 3                       | 149.582 | <0.01  |       |
|                  |                          | MCAO/R vs<br>MCAO/R+R1                     |                         |         | <0.01  |       |
| Figure 6         | A                        | Serum BDNF (7 d)                           | Sham vs MCAO/R          | 7       | 25.034 | <0.01 |
|                  |                          |                                            | MCAO/R vs<br>MCAO/R+R1  |         |        | <0.01 |
|                  |                          | Serum BDNF (28 d)                          | Sham vs MCAO/R          |         |        | <0.01 |
|                  |                          |                                            | MCAO/R vs<br>MCAO/R+R1  |         |        | >0.05 |
|                  | B                        | Cortex BDNF (7 d)                          | Cortex BDNF (7 d)       | 3       | 9.313  | <0.01 |
|                  |                          |                                            | MCAO/R vs<br>MCAO/R+R1  |         |        | <0.01 |
|                  |                          | Cortex BDNF (28 d)                         | Cortex BDNF (7 d)       |         |        | <0.01 |
|                  |                          |                                            | MCAO/R vs<br>MCAO/R+R1  |         |        | >0.05 |
|                  | C                        | Serum NGF (7 d)                            | Sham vs MCAO/R          | 7       | 21.426 | <0.01 |
|                  |                          |                                            | MCAO/R vs<br>MCAO/R+R1  |         |        | <0.01 |
| Serum NGF (28 d) |                          | Sham vs MCAO/R                             | <0.01                   |         |        |       |

|                    |                       |                             |                        |       |        |        |       |
|--------------------|-----------------------|-----------------------------|------------------------|-------|--------|--------|-------|
|                    |                       |                             | MCAO/R vs<br>MCAO/R+R1 |       |        | <0.01  |       |
| D                  | Cortex NGF (7 d)      | Sham vs MCAO/R              |                        | 3     | 3.817  | >0.05  |       |
|                    |                       | MCAO/R vs<br>MCAO/R+R1      |                        |       |        | <0.01  |       |
|                    | Cortex NGF (28 d)     | Sham vs MCAO/R              |                        | <0.01 |        |        |       |
|                    |                       | MCAO/R vs<br>MCAO/R+R1      |                        | >0.05 |        |        |       |
| E                  | Serum NT-4 (7 d)      | Sham vs MCAO/R              |                        | 7     | 32.745 | >0.05  |       |
|                    |                       | MCAO/R vs<br>MCAO/R+R1      |                        |       |        | <0.01  |       |
|                    | Serum NT-4 (28 d)     | Sham vs MCAO/R              |                        | <0.01 |        |        |       |
|                    |                       | MCAO/R vs<br>MCAO/R+R1      |                        | <0.01 |        |        |       |
| F                  | Cortex NT-4 (7 d)     | Sham vs MCAO/R              |                        | 3     | 5.042  | <0.01  |       |
|                    |                       | MCAO/R vs<br>MCAO/R+R1      |                        |       |        | <0.01  |       |
|                    | Cortex NT-4 (28 d)    | Sham vs MCAO/R              |                        | <0.01 |        |        |       |
|                    |                       | MCAO/R vs<br>MCAO/R+R1      |                        | <0.01 |        |        |       |
| I                  | SYP/ $\beta$ -actin   | Sham vs MCAO/R              |                        | 3     | 6.915  | >0.05  |       |
|                    |                       | MCAO/R vs<br>MCAO/R+R1      |                        |       |        | <0.01  |       |
| J                  | PSD95/ $\beta$ -actin | Sham vs MCAO/R              |                        | 3     | 32.022 | <0.01  |       |
|                    |                       | MCAO/R vs<br>MCAO/R+R1      |                        |       |        | <0.05  |       |
| K                  | MAP-2/ $\beta$ -actin | Sham vs MCAO/R              |                        | 3     | 14.774 | <0.05  |       |
|                    |                       | MCAO/R vs<br>MCAO/R+R1      |                        |       |        | <0.01  |       |
| L                  | Tau-1/ $\beta$ -actin | Sham vs MCAO/R              |                        | 3     | 6.592  | >0.05  |       |
|                    |                       | MCAO/R vs<br>MCAO/R+R1      |                        |       |        | <0.01  |       |
| Figure 7           | B                     | BDNF/ $\beta$ -actin (7 d)  | Sham vs MCAO/R         |       | 3      | 3.034  | <0.05 |
|                    |                       |                             | MCAO/R vs<br>MCAO/R+R1 |       |        |        | <0.05 |
|                    |                       | BDNF/ $\beta$ -actin (28 d) | Sham vs MCAO/R         |       | >0.05  |        |       |
|                    |                       |                             | MCAO/R vs<br>MCAO/R+R1 |       | <0.05  |        |       |
|                    | C                     | p-TrkB/TrkB (7 d)           | Sham vs MCAO/R         |       | 3      | 42.002 | <0.01 |
|                    |                       |                             | MCAO/R vs<br>MCAO/R+R1 |       |        |        | <0.05 |
| p-TrkB/TrkB (28 d) | Sham vs MCAO/R        |                             | 18.089                 | <0.01 |        |        |       |

|          |                      |                         |                        |   |        |       |
|----------|----------------------|-------------------------|------------------------|---|--------|-------|
|          |                      |                         | MCAO/R vs<br>MCAO/R+R1 | 3 |        | <0.05 |
| D        | p-CREB/CREB (7 d)    | Sham vs MCAO/R          |                        | 3 | 5.694  | <0.01 |
|          |                      | MCAO/R vs<br>MCAO/R+R1  |                        |   |        | <0.01 |
|          | p-CREB/CREB (28 d)   | Sham vs MCAO/R          |                        | 3 | 47.084 | <0.01 |
|          |                      | MCAO/R vs<br>MCAO/R+R1  |                        |   |        | <0.01 |
| E        | p-AKT/AKT (7 d)      | Sham vs MCAO/R          |                        | 3 | 4.091  | <0.01 |
|          |                      | MCAO/R vs<br>MCAO/R+R1  |                        |   |        | <0.05 |
|          | p-AKT/AKT (28 d)     | Sham vs MCAO/R          |                        | 3 | 6.16   | <0.01 |
|          |                      | MCAO/R vs<br>MCAO/R+R1  |                        |   |        | <0.01 |
| I        | Glutamate            | Sham vs MCAO/R          |                        | 3 | 2.624  | <0.05 |
|          |                      | MCAO/R vs<br>MCAO/R+R1  |                        |   |        | <0.05 |
|          |                      | MCAO/R vs<br>MCAO/R+NBP |                        |   |        | >0.05 |
| J        | N-acetyl-L-Aspartate | Sham vs MCAO/R          |                        | 3 | 3.323  | <0.01 |
|          |                      | MCAO/R vs<br>MCAO/R+R1  |                        |   |        | <0.05 |
|          |                      | MCAO/R vs<br>MCAO/R+NBP |                        |   |        | >0.05 |
| K        | K <sup>+</sup>       | Sham vs MCAO/R          |                        | 3 | 7.967  | <0.01 |
|          |                      | MCAO/R vs<br>MCAO/R+R1  |                        |   |        | <0.01 |
|          |                      | MCAO/R vs<br>MCAO/R+NBP |                        |   |        | <0.05 |
| Figure 8 | C                    | Proliferation rate      | Cont vs 0              | 5 | 20.501 | <0.01 |
|          |                      |                         | 0 vs 12.5              |   |        |       |
|          |                      |                         | 0 vs 25                |   |        | <0.01 |
|          |                      |                         | 0 vs 50                |   |        | <0.01 |
|          |                      |                         | 0 vs 100               |   |        | <0.01 |
|          | D                    | Proliferation rate      | Cont vs 0              | 4 | 23.680 | <0.01 |
|          |                      |                         | 0 vs 25                |   |        | <0.01 |
|          |                      |                         | 25 vs AVA              |   |        | <0.05 |
|          |                      |                         | 25 vs LY               |   |        | <0.01 |
|          | F                    | BDNF/ $\beta$ -actin    | Cont vs OGD/R          | 4 | 6.478  | <0.01 |
|          |                      |                         | OGD/R vs R1            |   |        | <0.01 |
|          |                      |                         | R1 vs VA               |   |        | <0.05 |
|          |                      |                         | R1 vs LY               |   |        | <0.01 |
|          | G                    | p-TrkB/TrkB             | Cont vs OGD/R          | 4 | 61.23  | <0.01 |

|                      |           |                             |                      |                |         |        |
|----------------------|-----------|-----------------------------|----------------------|----------------|---------|--------|
|                      |           |                             | OGD/R vs R1          |                |         | <0.01  |
|                      |           |                             | R1 vs VA             |                |         | <0.01  |
|                      |           |                             | R1 vs LY             |                |         | <0.01  |
|                      | H         | p-CREB/CREB                 | Cont vs OGD/R        | 4              | 4.663   | <0.01  |
|                      |           |                             | OGD/R vs R1          |                |         | <0.01  |
|                      |           |                             | R1 vs VA             |                |         | <0.05  |
|                      |           |                             | R1 vs LY             |                |         | <0.05  |
|                      | I         | p-AKT/AKT                   | Cont vs OGD/R        | 4              | 5.593   | <0.05  |
|                      |           |                             | OGD/R vs R1          |                |         | <0.01  |
|                      |           |                             | R1 vs VA             |                |         | <0.05  |
|                      |           |                             | R1 vs LY             |                |         | <0.01  |
|                      | Figure S1 | B                           | Evans blue leakage   | Sham vs MCAO/R | 3       | 22.858 |
| MCAO/R vs MCAO/R+R1  |           |                             |                      | <0.01          |         |        |
| MCAO/R vs MCAO/R+NIM |           |                             |                      | <0.01          |         |        |
| C                    |           | Brain water content         | Sham vs MCAO/R       | 3              | 38.538  | <0.01  |
|                      |           |                             | MCAO/R vs MCAO/R+R1  |                |         | <0.01  |
|                      |           |                             | MCAO/R vs MCAO/R+NIM |                |         | <0.01  |
| D                    |           | Relative protein expression | Claudin-5 (7 d)      | 11             | 325.796 | >0.05  |
|                      |           |                             | Occludin (7 d)       |                |         | <0.01  |
|                      |           |                             | Zo-1 (7 d)           |                |         | <0.01  |
|                      |           |                             | Claudin-5 (28 d)     |                |         | <0.01  |
|                      |           |                             | Occludin (28 d)      |                |         | <0.01  |
|                      |           |                             | Zo-1 (28 d)          |                |         | <0.01  |
