# Supplementary material for: Notoginsenoside R1 Improves Cerebral Ischemia/Reperfusion Injury by Promoting Neurogenesis via the BDNF/Akt/CREB Pathway
Source: PubMed Central journal article supplement (PMC8138209; doi:10.3389/fphar.2021.615998), 2021-05-07
Supplement: Image1.pdf [file Image1.pdf]

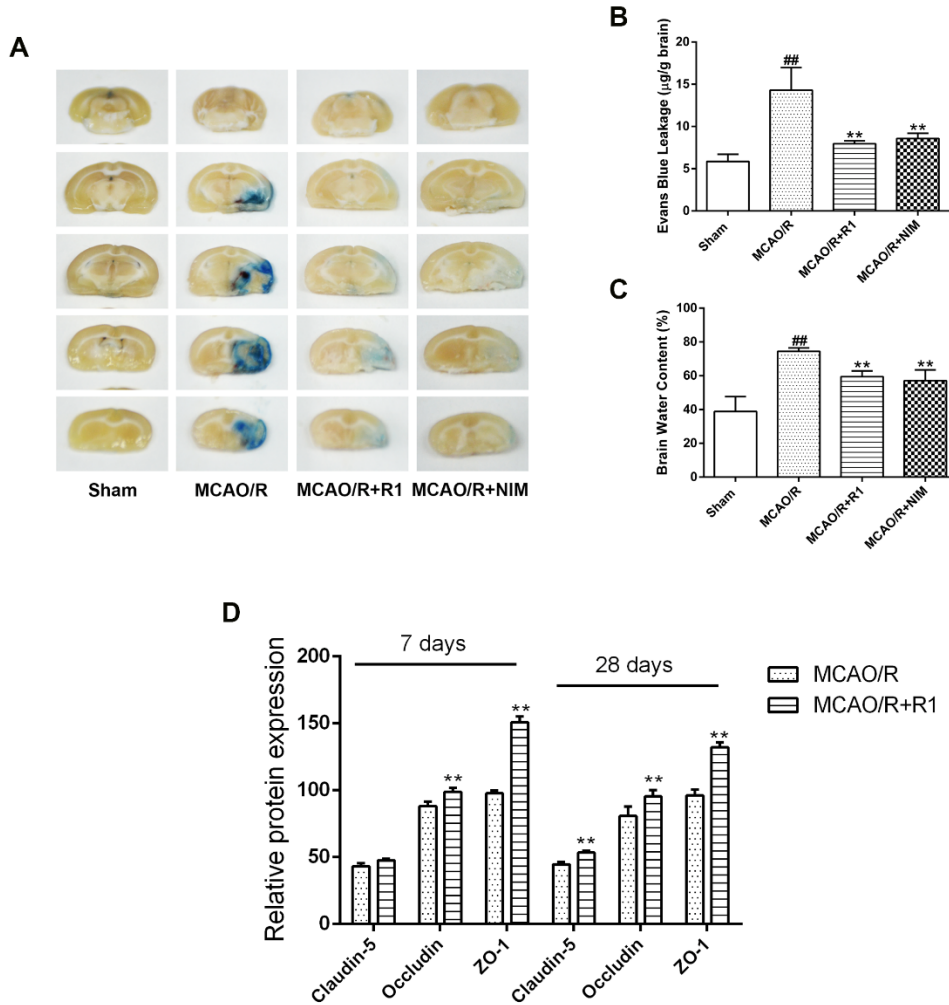

**Figure S1.** R1 alleviates the BBB disruption. **(A)** Evans blue leakage in ischemia hemispheres of all groups.  $n = 5$  in each group. **(B)** Quantification of the Evans blue leakage in ischemia hemispheres of all groups.  $n = 5$  in each group. **(C)** Brain water content in ischemia hemispheres of all groups.  $n = 5$  in each group. **(D)** Serum levels of BBB-related factors, such as Claudin-5, Occludin and ZO-1, were detected by ELISA on days 7 and 28 after MCAO surgery.  $n = 5$  in each group. Data are expressed as the mean  $\pm$  SD and were analyzed by ANOVA. <sup>##</sup>  $p < 0.01$  vs. Sham group; <sup>\*\*</sup>  $p < 0.01$  vs. MCAO/R group.
